# Supplementary material for: Ecological, Social, and Other Environmental Determinants of Dengue Vector Abundance in Urban and Rural Areas of Northeastern Thailand
Source: MDPI journal article supplement (doi:10.3390/ijerph18115971), 2021-06-02
Supplement: s1 [file s1]

**Additional file 1: Table S1. Summarized knowledge characteristics regarding climate change among study populations in selected urban and rural villages in northeastern Thailand (percentages in parentheses)**

| Factors                                                                                                                                                                   | Urban     | Rural     | Total      | $\chi^2$ ( <i>P value</i> ) |
|---------------------------------------------------------------------------------------------------------------------------------------------------------------------------|-----------|-----------|------------|-----------------------------|
| N (No of households)                                                                                                                                                      | 64        | 64        | 128        |                             |
| <b><u>Beliefs, understanding &amp; awareness about climate change and its connection to dengue?</u></b>                                                                   |           |           |            |                             |
| <b>K1. Have you heard about climate change?</b>                                                                                                                           |           |           |            | 2.9 (.08)                   |
| No                                                                                                                                                                        | 2 (3.1)   | 7 (10.9)  | 9 (7.0)    |                             |
| Yes                                                                                                                                                                       | 61 (95.0) | 58 (90.0) | 119 (93.0) |                             |
| <b>K2. Do you believe the climate is changing?</b>                                                                                                                        |           |           |            | .09 (.75)                   |
| No                                                                                                                                                                        | 5 (7.8)   | 6 (9.4)   | 11 (8.6)   |                             |
| Yes                                                                                                                                                                       | 58 (91.2) | 57 (89.0) | 117 (91.4) |                             |
| <b>K3. Understanding and awareness about climate change</b>                                                                                                               |           |           |            | .05 (.97)                   |
| Good                                                                                                                                                                      | 24 (37.5) | 23 (35.9) | 47 (36.7)  |                             |
| Medium                                                                                                                                                                    | 27 (42.2) | 27 (42.2) | 54 (42.2)  |                             |
| Poor                                                                                                                                                                      | 13 (20.3) | 14 (21.9) | 27 (21.1)  |                             |
| <b>K4. Do you think changes in climate can affect dengue fever and its vector?</b>                                                                                        |           |           |            | 1.9 (.16)                   |
| No                                                                                                                                                                        | 14 (21.9) | 21 (32.8) | 35 (27.3)  |                             |
| Yes                                                                                                                                                                       | 50 (78.1) | 43 (67.2) | 93 (72.7)  |                             |
| <b><u>Local &amp; global climate change problem</u></b>                                                                                                                   |           |           |            |                             |
| <b>K5. What type of change to the climate do you think has happened in your area?</b>                                                                                     |           |           |            |                             |
| Excessive temperature                                                                                                                                                     | 63 (98.4) | 61 (95.3) | 124 (96.9) | 1.03 (.31)                  |
| Change of pattern of rainfall                                                                                                                                             | 36 (56.3) | 33 (51.6) | 69 (53.9)  | .28 (.59)                   |
| <b>K6. What have you already heard about the possible future effects of climate change and topic of global climate change and changing mosquito habitat suitability)?</b> |           |           |            |                             |
| More rain                                                                                                                                                                 | 17 (26.6) | 19 (29.7) | 36 (28.1)  | .15 (.69)                   |
| Hotter                                                                                                                                                                    | 54 (84.4) | 48 (75.0) | 102 (79.7) | 1.7 (.18)                   |
| More floods                                                                                                                                                               | 17 (26.6) | 16 (25.0) | 33 (25.8)  | .04 (.84)                   |
| <b>K7. What do you think is the biggest local climate change problem?</b>                                                                                                 |           |           |            |                             |
| Increase in extreme weather (more heat/ very cold/ heavy or torrential rainfall)                                                                                          | 46 (71.9) | 41 (64.1) | 87 (68.0)  | .89 (.34)                   |
| Floods                                                                                                                                                                    | 9 (14.1)  | 6 (9.4)   | 15 (11.7)  | .68 (.41)                   |
| <b>Summarized knowledge level (good vs poor)</b>                                                                                                                          |           |           |            | 1.06 (.30)                  |
| Poor                                                                                                                                                                      | 46 (71.9) | 51 (79.7) | 97 (75.8)  |                             |
| Good                                                                                                                                                                      | 18 (28.1) | 13 (20.3) | 31 (24.2)  |                             |

All P-values are based on a Chi-square test or Fisher's exact test (as appropriate) for independence analysis based on knowledge characteristics regarding climate change (in respective study sites, separately). Knowledge scores considered ( $\geq 80$  = good and  $< 80$  = poor).

**Additional file 2: Table S2. Summarized attitude characteristics regarding climate change among study populations in selected urban and rural villages in northeastern Thailand (percentages in parentheses)**

| Factors                                                                                                                                 | Urban     | Rural     | Total      | $\chi^2$ ( <i>P value</i> ) |
|-----------------------------------------------------------------------------------------------------------------------------------------|-----------|-----------|------------|-----------------------------|
| N (No of households)                                                                                                                    | 64        | 64        | 128        |                             |
| <b>A1. How serious a problem do you think climate change and more spread of dengue fever at this moment?</b>                            |           |           |            | 1.02 (.60)                  |
| Not serious                                                                                                                             | 10 (15.6) | 12 (18.8) | 22 (17.2)  |                             |
| Moderately serious                                                                                                                      | 20 (31.3) | 15 (23.4) | 35 (27.3)  |                             |
| Extremely serious                                                                                                                       | 34 (53.1) | 37 (57.8) | 71 (55.5)  |                             |
| <b>A2. Are you concerned that Climate Change is causing more dengue fever in your area?</b>                                             |           |           |            | .77 (.38)                   |
| No                                                                                                                                      | 11 (17.2) | 15 (23.4) | 26 (20.3)  |                             |
| Yes                                                                                                                                     | 53 (82.8) | 49 (76.6) | 102 (79.7) |                             |
| <b>A3. Do you think we can reduce dengue risk due to climate change?</b>                                                                |           |           |            | 3.51 (.06)                  |
| We can and must                                                                                                                         | 57 (89.1) | 49 (76.6) | 106 (82.8) |                             |
| We can't change                                                                                                                         | 7 (10.9)  | 15 (23.4) | 22 (17.2)  |                             |
| <b>A4. Should media take a leading role in raising awareness about climate change and dengue risk reduction and prevention issues?</b>  |           |           |            | .06 (.79)                   |
| No                                                                                                                                      | 8 (12.5)  | 9 (14.1)  | 17 (13.3)  |                             |
| Yes                                                                                                                                     | 56 (87.5) | 55 (85.9) | 111 (86.7) |                             |
| <b>A5. Do you think the government should do something to mitigate dengue risk that may spread due to climate change?</b>               |           |           |            | 13.3 (.000)                 |
| No                                                                                                                                      | 14 (21.9) | 34 (53.1) | 48 (37.5)  |                             |
| Yes                                                                                                                                     | 50 (78.1) | 30 (46.9) | 80 (62.5)  |                             |
| <b>A7. Need for better awareness and knowledge on climate change?</b>                                                                   |           |           |            | 3.9 (.04)                   |
| No                                                                                                                                      | 2 (3.1)   | 8 (12.5)  | 10 (7.8)   |                             |
| Yes                                                                                                                                     | 62 (96.9) | 56 (87.5) | 118 (92.2) |                             |
| <b>A8. Would you like to personally receive information about climate change updates and how to protect yourself from dengue fever?</b> |           |           |            | 1.8 (.17)                   |
| No                                                                                                                                      | 4 (6.3)   | 1 (1.6)   | 5 (3.9)    |                             |
| Yes                                                                                                                                     | 60 (93.8) | 63 (98.4) | 123 (96.1) |                             |
| <b>Summarized attitude level (good vs poor)</b>                                                                                         |           |           |            | 1.62 (.20)                  |
| Poor                                                                                                                                    | 21 (32.8) | 28 (43.8) | 49 (38.3)  |                             |
| Good                                                                                                                                    | 43 (67.2) | 36 (56.3) | 79 (61.7)  |                             |

All *P*-values are based on a Chi-square test or Fisher's exact test (as appropriate) for independence analysis based on attitude characteristics regarding climate change (in respective study sites, separately). Attitude scores considered ( $\geq 80$  = good and  $<80$  = poor).

**Additional file 3: Table S3. Summarized practice characteristics regarding climate change among study populations in selected urban and rural villages in northeastern Thailand (percentages in parentheses)**

| Factors                                                                                                                                                        | Urban     | Rural     | Total      | $\chi^2$ ( <i>P value</i> ) |
|----------------------------------------------------------------------------------------------------------------------------------------------------------------|-----------|-----------|------------|-----------------------------|
| N (No of households)                                                                                                                                           | <b>64</b> | <b>64</b> | <b>128</b> |                             |
| <b>P1. Have you taken any actions to prepare and reduce dengue risk due to climate change?</b>                                                                 |           |           |            | 11.03 (.004)                |
| Yes, many                                                                                                                                                      | 18 (28.1) | 29 (45.3) | 47 (36.7)  |                             |
| Some/few                                                                                                                                                       | 45 (70.3) | 28 (43.8) | 73 (57.0)  |                             |
| No, nothing                                                                                                                                                    | 1 (1.6)   | 7 (10.9)  | 8 (6.3)    |                             |
| <b>P2. During the last year, have you done anything about changes in mosquito control practice following an extreme event and prevent dengue risk?</b>         |           |           |            | .43 (.51)                   |
| No                                                                                                                                                             | 6 (9.4)   | 4 (6.3)   | 10 (7.8)   |                             |
| Yes                                                                                                                                                            | 58 (90.6) | 60 (93.8) | 118 (92.2) |                             |
| <b>P3. Kinds of practice following an extreme event and prevent dengue risk?</b>                                                                               |           |           |            |                             |
| Cleaned drains                                                                                                                                                 | 38 (59.4) | 35 (54.7) | 73 (57.0)  | .28 (.59)                   |
| Cleaned or helped to maintain public drainage systems from waste                                                                                               | 44 (68.8) | 35 (54.7) | 79 (61.7)  | 2.6 (.10)                   |
| <b>P4. Do you or your household members use the internet?</b>                                                                                                  |           |           |            | 3.08 (.07)                  |
| No                                                                                                                                                             | 9 (14.1)  | 17 (26.6) | 26 (20.3)  |                             |
| Yes                                                                                                                                                            | 55 (85.9) | 47 (73.4) | 102 (79.7) |                             |
| <b>P5. Which of the following modes of information collection and communication tools you use for climate literacy (adaptation and mitigation capacities)?</b> |           |           |            |                             |
| Newspaper                                                                                                                                                      | 8 (12.5)  | 3 (4.7)   | 11 (8.6)   | 2.48 (.11)                  |
| TV (local/International)                                                                                                                                       | 63 (98.4) | 52 (81.3) | 115 (89.8) | 10.3 (.01)                  |
| Radio                                                                                                                                                          | 14 (21.9) | 6 (9.4)   | 20 (15.6)  | 3.79 (.01)                  |
| Social Media (Facebook, Line, Instagram, etc.)                                                                                                                 | 42 (65.6) | 34 (53.1) | 76 (59.4)  | 2.07 (.15)                  |
| <b>P6. How often you use the above modes of communication</b>                                                                                                  |           |           |            | 7.2 (.02)                   |
| Everyday                                                                                                                                                       | 62 (96.9) | 54 (84.4) | 116 (90.6) |                             |
| Some times                                                                                                                                                     | 2 (3.1)   | 4 (6.3)   | 6 (4.7)    |                             |
| Never use                                                                                                                                                      | 0 (0.0)   | 6 (9.4)   | 6 (4.7)    |                             |
| <b>Summarized practice level (good vs poor)</b>                                                                                                                |           |           |            | 2.59 (.10)                  |
| Poor                                                                                                                                                           | 49 (75.6) | 56 (87.5) | 105 (82.0) |                             |
| Good                                                                                                                                                           | 15 (23.4) | 8 (12.5)  | 23 (18.0)  |                             |

All *P*-values are based on a Chi-square test or Fisher's exact test (as appropriate) for independence analysis based on practice characteristics regarding climate change (in respective study sites, separately). Practice scores considered ( $\geq 80$  = good and  $<80$  = poor).

**Additional file 4: Table S4. Summarized knowledge characteristics regarding dengue among study populations in selected urban and rural villages in northeastern Thailand (percentages in parentheses)**

| Factors                                                                    | Urban     | Rural     | Total      | $\chi^2$ ( <i>P value</i> ) |
|----------------------------------------------------------------------------|-----------|-----------|------------|-----------------------------|
| N (No of households)                                                       | 64        | 64        | 128        |                             |
| <b>Knowledge, Understanding and awareness about dengue</b>                 |           |           |            |                             |
| <b>Transmission of dengue</b>                                              |           |           |            |                             |
| K1. Dengue is caused by a virus                                            | 49 (76.6) | 50 (78.1) | 99 (77.3)  | .04 (.83)                   |
| K2. Dengue virus has four serotypes                                        | 23 (35.9) | 30 (46.9) | 53 (41.4)  | 1.5 (.20)                   |
| K3. A person is vulnerable/can get dengue more than once                   | 51 (79.7) | 47 (73.4) | 98 (76.6)  | .69 (.40)                   |
| K4. <i>Ae. aegypti</i> and <i>Ae. albopictus</i> are the vectors of dengue | 42 (65.6) | 21 (32.8) | 63 (49.2)  | 13.78 (.000)                |
| K5. Do <i>Aedes</i> mosquitoes transmit DF                                 | 53 (82.8) | 59 (92.2) | 112 (87.5) | 2.5 (.10)                   |
| <b>symptoms and signs of dengue</b>                                        |           |           |            |                             |
| K6. Fever                                                                  | 58 (90.6) | 57 (89.1) | 115 (89.8) | .08 (.77)                   |
| K7. Headache                                                               | 39 (60.9) | 41 (64.1) | 80 (62.5)  | .13 (.71)                   |
| K8. Joint pains                                                            | 33 (51.6) | 32 (50.0) | 65 (50.8)  | .03 (.86)                   |
| K9. Muscle pain                                                            | 33 (51.6) | 34 (53.1) | 67 (52.3)  | .03 (.86)                   |
| K10. Pain behind the eyes                                                  | 31 (48.4) | 30 (46.9) | 61 (47.7)  | .03 (.86)                   |
| K11. Nausea/vomiting                                                       | 34 (53.1) | 26 (40.6) | 60 (46.9)  | 2.0 (.15)                   |
| <b>K12. Most frequent bite time of mosquitoes (Day time)</b>               |           |           |            | 1.03 (.30)                  |
| No                                                                         | 7 (10.9)  | 11 (17.2) | 18 (14.1)  |                             |
| Yes                                                                        | 57 (89.1) | 53 (82.8) | 110 (85.9) |                             |
| <b>Vector morphology (identification)</b>                                  |           |           |            |                             |
| K13. Can you identify <i>Aedes</i> mosquitoes?                             | 40 (62.5) | 36 (56.3) | 76 (59.4)  | .51 (.47)                   |
| Have white spots on their legs                                             | 34 (53.1) | 15 (23.4) | 49 (38.3)  | 11.93 (.001)                |
| <b>Vector breeding (places)</b>                                            |           |           |            |                             |
| K14. Breed in standing water                                               | 60 (93.8) | 57 (89.1) | 117 (91.4) | .89 (.34)                   |
| K15. Breed in clean water                                                  | 47 (73.4) | 53 (82.8) | 100 (78.1) | 1.64 (.20)                  |
| K16. Breed in leaf axils and plant surfaces                                | 33 (51.6) | 36 (56.3) | 69 (53.9)  | .28 (.59)                   |
| K17. Breed in water retention tanks in K18. A\C machines and refrigerators | 40 (62.5) | 34 (53.1) | 74 (57.8)  | 1.15 (.28)                  |
| K19. In the abandoned tyres                                                | 62 (96.9) | 63 (98.4) | 125 (97.7) | .34 (.55)                   |
| <b>Summarized knowledge level (good vs poor)</b>                           |           |           |            | .28 (.59)                   |
| Poor                                                                       | 35 (54.7) | 38 (59.4) | 73 (57.0)  |                             |
| Good                                                                       | 29 (45.3) | 26 (40.6) | 55 (43.0)  |                             |

All *P*-values are based on a Chi-square test or Fisher's exact test (as appropriate) for independence analysis based on knowledge characteristics regarding dengue (in respective study sites, separately). Knowledge scores considered ( $\geq 80$  = good and  $< 80$  = poor).

**Additional file 5: Table S5. Summarized attitude characteristics regarding dengue among study populations in selected urban and rural villages in northeastern Thailand (percentages in parentheses)**

| Factors                                                                                                            | Urban     | Rural     | Total      | $\chi^2$ ( <i>P value</i> ) |
|--------------------------------------------------------------------------------------------------------------------|-----------|-----------|------------|-----------------------------|
| N (No of households)                                                                                               | <b>64</b> | <b>64</b> | <b>128</b> |                             |
| <b>A1. Controlling of the breeding places of mosquitoes a good strategy to prevent DF?</b>                         |           |           |            | .05 (.82)                   |
| No                                                                                                                 | 13 (20.3) | 12 (18.8) | 25 (19.5)  |                             |
| Yes                                                                                                                | 51 (79.7) | 52 (81.3) | 103 (80.5) |                             |
| <b>A2. Communities should actively participate in controlling the vectors of DENV?</b>                             |           |           |            | 1.44 (.23)                  |
| No                                                                                                                 | 20 (31.3) | 14 (21.9) | 34 (26.6)  |                             |
| Yes                                                                                                                | 44 (68.8) | 50 (78.1) | 94 (73.4)  |                             |
| <b>A3. Change the water in plant pot trays every week</b>                                                          |           |           |            | 5.8 (.05)                   |
| Extremely confident                                                                                                | 54 (84.4) | 47 (73.4) | 101 (78.9) |                             |
| Moderately confident                                                                                               | 8 (12.5)  | 7 (10.9)  | 15 (11.7)  |                             |
| Not at all                                                                                                         | 2 (3.1)   | 10 (15.6) | 12 (9.4)   |                             |
| <b>A4. Clean the drain from blockage every 7 days</b>                                                              |           |           |            | 10.3 (.006)                 |
| Extremely confident                                                                                                | 52 (81.3) | 41 (64.1) | 93 (72.7)  |                             |
| Moderately confident                                                                                               | 10 (15.6) | 9 (14.1)  | 19 (14.8)  |                             |
| Not at all                                                                                                         | 2 (3.1)   | 14 (21.9) | 16 (12.5)  |                             |
| <b>A5. I can always cover tightly all water containers inside and outside house</b>                                |           |           |            | 2.17 (0.33)                 |
| Extremely confident                                                                                                | 49 (76.6) | 45 (70.3) | 94 (73.4)  |                             |
| Moderately confident                                                                                               | 13(20.3)  | 13 (20.3) | 26 (20.3)  |                             |
| Not at all                                                                                                         | 2 (3.1)   | 6 (9.4)   | 8 (6.3)    |                             |
| <b>A6. I can allow health authority for inspection of mosquito larvae and fogging inside and outside the house</b> |           |           |            | 5.3 (.06)                   |
| Extremely confident                                                                                                | 53 (82.8) | 61 (95.3) | 114 (89.1) |                             |
| Moderately confident                                                                                               | 9 (14.1)  | 2 (3.1)   | 11 (8.6)   |                             |
| Not at all                                                                                                         | 2 (3.1)   | 1 (1.6)   | 3 (2.3)    |                             |
| <b>A7. I can always convince my family to sleep under a mosquito net every day/night</b>                           |           |           |            | 6.8 (.03)                   |
| Extremely confident                                                                                                | 50 (78.1) | 59 (92.2) | 109 (85.2) |                             |
| Moderately confident                                                                                               | 9 (14.1)  | 5 (7.8)   | 14 (10.9)  |                             |
| Not at all                                                                                                         | 5 (7.8)   | 0 (0.0)   | 5 (3.9)    |                             |
| <b>Summarized attitude level (good vs poor)</b>                                                                    |           |           |            | .58 (.44)                   |
| Poor                                                                                                               | 18 (28.1) | 22 (34.3) | 40 (31.3)  |                             |
| Good                                                                                                               | 46 (71.9) | 42 (65.6) | 88 (68.8)  |                             |

All *P*-values are based on a Chi-square test or Fisher's exact test (as appropriate) for independence analysis based on attitude characteristics regarding dengue (in respective study sites, separately). Attitude scores considered ( $\geq 80$  = good and  $< 80$  = poor).

**Additional file 6: Table S6. Summarized practice characteristics regarding dengue among study populations in selected urban and rural villages in northeastern Thailand (percentages in parentheses)**

| Factors | Urban | Rural | Total | $\chi^2$ ( <i>P value</i> ) |
|---------|-------|-------|-------|-----------------------------|
|---------|-------|-------|-------|-----------------------------|

|                                                                                                                 |           |           |            |             |
|-----------------------------------------------------------------------------------------------------------------|-----------|-----------|------------|-------------|
| N (No of households)                                                                                            | 64        | 64        | 128        |             |
| <b>Dengue prevention practices</b>                                                                              |           |           |            |             |
| <b>Bite prevention practices by the respondents</b>                                                             |           |           |            |             |
| P1. Prevent mosquito-man contact                                                                                | 49 (76.6) | 35 (54.7) | 84 (65.6)  | 6.7 (.009)  |
| P2. Use mosquito coils to reduce mosquitoes                                                                     | 31 (48.4) | 34 (53.1) | 65 (50.8)  | .28 (.59)   |
| P3. Use mosquito repellent/cream                                                                                | 29 (45.3) | 28 (43.8) | 57 (44.5)  | .03 (.85)   |
| P4. Use of smoke to drive away mosquitoes                                                                       | 16 (25.0) | 20 (31.3) | 36 (28.1)  | .61 (.43)   |
| P5. Covering body with clothe                                                                                   | 30 (46.9) | 46 (71.9) | 76 (59.4)  | 8.2 (.004)  |
| P6. Use window screens and bed net steps                                                                        | 46 (71.9) | 32 (50.0) | 78 (60.9)  | 6.4 (.01)   |
| <b>Aedes breeding sites</b>                                                                                     |           |           |            |             |
| P7. What steps do you take to prevent mosquito breeding?<br>during an outbreak?                                 |           |           |            |             |
| P8. Cleaning of garbage/trash                                                                                   | 33 (51.6) | 38 (59.4) | 71 (55.5)  | .79 (.37)   |
| P9. Disposing water holding containers such as tires, parts of<br>automobiles, plastic bottles, crack pots etc. | 61 (95.3) | 57 (89.1) | 118 (92.2) | 1.7 (.18)   |
| P10. Cover tightly all water containers                                                                         | 41 (64.1) | 43 (67.2) | 84 (65.6)  | .13 (.71)   |
| P11. Frequently cleaning water filled containers and ditches<br>around the house                                | 36 (56.3) | 43 (67.2) | 79 (61.7)  | 1.6 (.20)   |
| P12. Use insecticide sprays to reduce mosquitoes steps                                                          | 39 (60.9) | 26 (40.6) | 65 (50.8)  | 5.2 (.02)   |
| P13. Adding larvicide in water containers steps                                                                 | 48 (75.0) | 52 (81.3) | 100 (78.1) | .73 (.39)   |
| P14. Remove water from flower pot trays steps                                                                   | 31 (48.4) | 10 (15.6) | 41 (32.0)  | 15.8 (.000) |
| P15. Change water in trays under the fridge steps                                                               | 36 (56.3) | 35 (54.7) | 71 (55.5)  | .03 (.85)   |
| P16. Destroy / burn unused container side sprays steps                                                          | 23 (35.9) | 17 (26.6) | 40 (31.3)  | 1.30 (.25)  |
| <b>Summarized practice level (good vs poor)</b>                                                                 |           |           |            | .64 (.42)   |
| Poor                                                                                                            | 45 (70.3) | 49 (76.6) | 94 (73.4)  |             |
| Good                                                                                                            | 19 (29.7) | 15 (23.4) | 34 (26.6)  |             |

---

All *P*-values are based on a Chi-square test or Fisher's exact test (as appropriate) for independence analysis based on practice characteristics regarding dengue (in respective study sites, separately). Practice scores considered ( $\geq 80$  = good and  $< 80$  = poor).
